# Supplementary material for: Fungal siderophore biosynthesis is partially localized in peroxisomes
Source: PubMed Central journal article supplement (PMC3709128; doi:10.1111/mmi.12225), 2013-04-26
Supplement: mmi0088-0862-SD1.pdf [file mmi0088-0862-SD1.pdf]

## Online supplemental material

**Table S1. Genomic organization of the siderophore biosynthetic genes *sidH*, *sidF*, *sidI*, *sidD*, *sidC* and *sidA* in various fungal species.** Genes that are colocalized in the genome, i.e. organized in gene clusters, are marked in grey or black, respectively. Grey and black represent two different gene clusters. The gene accession numbers encoding orthologs to SidI, SidH and SidF correspond to the proteins listed in Table 1 and Table S2. Abbreviations: E, *Eurotiomycetes*; L, *Leotiomycetes*; S, *Sordariomycetes*; D, *Dothideomycetes*; B, *Basidiomycota*.

| <i>sidH</i>    | <i>sidF</i>    | <i>sidD</i>    | <i>sidI</i>    | <i>sidC</i>    | <i>sidA</i>    |                                 |   |
|----------------|----------------|----------------|----------------|----------------|----------------|---------------------------------|---|
| AFUA_3G03410   | AFUA_3G03400   | AFUA_3G03420   | AFUA_1G17190   | AFUA_1G17200   | AFUA_2G07680   | <i>Aspergillus fumigatus</i>    | E |
| NFIA_005580    | NFIA_005570    | NFIA_005590    | NFIA_008180    | NFIA_008170    | NFIA_083410    | <i>Neosartorya fischeri</i>     |   |
| AO090103000168 | AO090103000169 | AO090103000167 | AO090023000529 | AO090023000528 | AO090011000926 | <i>Aspergillus oryzae</i>       |   |
| AN6235         | AN6234         | AN6236         | AN0609         | AN0607         | AN5823         | <i>Aspergillus nidulans</i>     |   |
| An03g03550     | An03g03540     | An03g03520     | An06g01320     | An06g01300     | An05g00220     | <i>Aspergillus niger</i>        |   |
| ACLA_061010    | ACLA_061020    | ACLA_061000    | ACLA_018340    | ACLA_079690    | ACLA_079680    | <i>Aspergillus clavatus</i>     |   |
| TSTA_100270    | TSTA_100280    | TSTA_100300    | TSTA_041590    | TSTA_090280    | TSTA_090270    | <i>Talaromyces stipitatus</i>   |   |
| Pc22g20370     | Pc22g20380     | Pc22g20400     | Pc21g23730     | Pc13g05250     | Pc13g05260     | <i>Penicillium chrysogenum</i>  |   |
| HCBG_04177     | HCBG_08322     | HCBG_09033     | HCBG_08321     | HCBG_04660     | HCBG_08320     | <i>Ajellomyces capsulatus</i>   |   |
| BC1G_10565     | BC1G_10564     | BC1G_10567     | BC1G_14541*    | BC1G_03511     | BC1G_03506     | <i>Botryotinia fuckeliana</i>   | L |
| SS1G_04249     | SS1G_04248     | SS1G_04250     | SS1G_13961     | SS1G_06185     | SS1G_03696     | <i>Sclerotinia sclerotiorum</i> |   |
| FG03746        | FG03745        | FG03747        | FG04333        | FG11026        | FG05872        | <i>Gibberella zeae</i>          | S |
| CHGG_09472     | CHGG_09473     | CHGG_09475     | CHGG_10903     | CHGG_02251     | CHGG_09542     | <i>Chaetomium globosum</i>      |   |
| PODANS72p146   | PODANSg2355    | PODANSg524     | PODANSg2356    | PODANSg3444    | PODANSg3445    | <i>Podospora anserina</i>       |   |
| NCU06960       | NCU06062       | NCU08441       | NCU06063       | NCU07119       | NCU07117       | <i>Neurospora crassa</i>        |   |
| MGG_14970      | MGG_08289      | MGG02351       | MGG_08288      | MGG_12175      | MGG_04212      | <i>Magnaporthe oryzae</i>       |   |
| SNOG_00297     | SNOG_14362     | SNOG_14368     | SNOG_14361     | SNOG_14834     | SNOG_14364     | <i>Phaeosphaeria nodorum</i>    | D |
| UM01433        | UM01432        | UM01434        | UM04803        | UM05165        | UM10188        | <i>Ustilago maydis</i>          | B |

**Table S2. Comparison of siderophore biosynthetic genes of *A. fumigatus* and *A. nidulans*.**

| gene        | gene locus <sup>a</sup> | <i>A. nidulans</i> ortholog <sup>a</sup><br>(gene locus) | % identity<br>(similarity) <sup>b</sup> | length <sup>a</sup> | proposed function                                                      |
|-------------|-------------------------|----------------------------------------------------------|-----------------------------------------|---------------------|------------------------------------------------------------------------|
| <i>sidA</i> | AFUA_2G07680            | AN5823.4                                                 | 77 (86)                                 | 498                 | <i>N</i> <sup>5</sup> -ornithine-monooxygenase (Eisendle et al., 2003) |
| <i>sidI</i> | AFUA_1G17190            | AN0609.4                                                 | 70 (77)                                 | 590                 | T AFC biosynthetic acyl-CoA ligase, PTS2 (Yasmin et al., 2011)         |
| <i>sidH</i> | AFUA_3G03410            | AN6235.4                                                 | 84 (90)                                 | 270                 | T AFC biosynthetic enoyl-CoA hydratase, PTS1 (Yasmin et al., 2011)     |
| <i>sidF</i> | AFUA_3G03400            | AN6234.4                                                 | 79 (89)                                 | 462                 | T AFC biosynthetic transacylase PTS1 (Schrettl et al., 2007)           |
| <i>sidD</i> | AFUA_3G03420            | AN6236.4                                                 | 64 (78)                                 | 2086                | fusarinine C NRPS (Schrettl et al., 2007)                              |
| <i>sidG</i> | AFUA_3G03650            | AN8539.4                                                 | 57 (72)                                 | 202                 | T AFC biosynthetic transacetylase (Schrettl et al., 2007)              |
| <i>sidL</i> | AFUA_1G04450            | AN10080.4                                                | 62 (75)                                 | 503                 | FC biosynthetic transacetylase (Blatzer et al., 2011)                  |
| <i>sidC</i> | AFUA1G17200             | AN0607.4                                                 | 55 (71)                                 | 4763                | Ferricrocin NRPS (Schrettl et al., 2007)                               |

<sup>a</sup> predicted gene and length of protein based on gene annotations ([http://www.broad.mit.edu/annotation/genome/aspergillus\\_group/MultiHome.html](http://www.broad.mit.edu/annotation/genome/aspergillus_group/MultiHome.html))

<sup>b</sup> BlastP (Altschul et al., 1990) of *A. fumigatus* protein against predicted *A. nidulans* sequence

**Table S3. Comparison of peroxins of *A. fumigatus* and *A. nidulans*.**

| Gene        | gene locus <sup>a</sup> | deletion strain      | <i>A. fumigatus</i> ortholog <sup>a</sup> | % identity<br>(similarity) <sup>b</sup> | length <sup>a</sup> | proposed function              |
|-------------|-------------------------|----------------------|-------------------------------------------|-----------------------------------------|---------------------|--------------------------------|
| <i>pexC</i> | AN2281.4                | <i>pexC::bar</i>     | AFUA_5G06300                              | 70 (82)                                 | 530                 | peroxisome membrane biogenesis |
| <i>pexE</i> | AN10215.4               | $\Delta$ <i>pexE</i> | AFUA_8G05240                              | 71 (76)                                 | 655                 | PTS1 protein import receptor   |
| <i>pexF</i> | AN2925.4                | <i>pexF23</i>        | AFUA_3G08000                              | 78 (87)                                 | 1476                | AAA ATPase, Pex5 recycling     |
| <i>pexG</i> | AN0880.4                | <i>pexG14</i>        | AFUA_1G15400                              | 85 (92)                                 | 355                 | PTS2 protein import receptor   |
| <i>pexK</i> | AN1921.4                | $\Delta$ <i>pexK</i> | AFUA_6G07740                              | 87 (96)                                 | 235                 | peroxisome proliferation       |
| <i>antA</i> | AN0257.4                | <i>antA15</i>        | AFUA_1G03440                              | 83 (91)                                 | 336                 | peroxisomal ATP carrier        |

<sup>a</sup> predicted gene and length of protein based on gene annotations ([http://www.broad.mit.edu/annotation/genome/aspergillus\\_group/MultiHome.html](http://www.broad.mit.edu/annotation/genome/aspergillus_group/MultiHome.html))

<sup>b</sup> BlastP (Altschul et al., 1990) of *A. fumigatus* protein against predicted *A. nidulans* sequence

**Table S4. Strains used in this study**

|                                     | genotype                                              | reference                   |
|-------------------------------------|-------------------------------------------------------|-----------------------------|
| <b><i>Aspergillus fumigatus</i></b> |                                                       |                             |
| ATCC46645                           | wild type (wt)                                        | American type culture       |
| $\Delta$ sidH                       | wt, sidH::hph/tk                                      | (Yasmin et al., 2011)       |
| $\Delta$ sidF                       | wt; sidF::hph                                         | (Schrettl et al., 2007)     |
| $\Delta$ sidI                       | wt; sidI::hph/tk                                      | (Yasmin et al., 2011)       |
| sidI-gfp                            | wt; sidI::sidI-gfp, ptrA                              | this study                  |
| gfp-sidH                            | $\Delta$ sidH, gfp-sidH(p), ptrA(p)                   | this study                  |
| gfp-sidF                            | $\Delta$ sidF, gfp-sidF(p), ptrA(p)                   | this study                  |
| gfp-sidH $\Delta$ PTS1              | $\Delta$ sidH, gfp-sidH $\Delta$ PTS1(p), ptrA(p)     | this study                  |
| gfp-sidH/rfp-pts1                   | gfp-sidH, rfp-pts1(p), phleo(p)                       | this study                  |
| <b><i>Aspergillus nidulans</i></b>  |                                                       |                             |
| WGTRAN, wt                          | argB2::pTran, argB; bgA0; biA1                        | (Brakhage & Turner, 1992)   |
| pexC::bar                           | biA1 niiA4 pyroA4 pexC::bar                           | (Hynes et al., 2008),       |
| $\Delta$ pexE                       | yA1, su-ad ad E20, pyroA4, areA102, riboB2,           | (Hynes et al., 2008),       |
| pexF23                              | yA1, pabaAI, PexF(6)23                                | (Hynes et al., 2008), BU223 |
| pexG14                              | yA1, pabaAI, PexG(7)14                                | (Hynes et al., 2008), BU414 |
| $\Delta$ pexK                       | yA1, su-ad ad E20, pyroA4, riboB2, areA102            | (Hynes et al., 2008),       |
| pexK-gfp                            | nkuAD pyroA4, pexK::gfp(PyroA+)                       | (Hynes et al., 2008),       |
| pexCc                               | pexC::bar, pl4(pyroA+) pexC                           | Hynes unpublished,          |
| pexEc                               | $\Delta$ pexE, pl4(pyroA+) pexE                       | Hynes unpublished,          |
| $\Delta$ pexE/pexF23                | yA1, pabaAI, pyroA4, PexG14, pexE(5) $\Delta$ (ribo+) | Hynes unpublished,          |
| wt gfp-sidH                         | wt, gfp-sidH(Af)(p); ptrA(p)                          | this study                  |
| $\Delta$ pexE gfp-sidH              | $\Delta$ pexE gfp-sidH(Af)(p), ptrA(p)                | this study                  |
| pexG14 gfp-sidH                     | pexG14 gfp-sidH(Af)(p), ptrA(p)                       | this study                  |
| wt gfp-sidI(Nc)                     | wt, gfp-sidI(Nc)(p), ptrA(p)                          | this study                  |
| $\Delta$ pexE gfp-sidI(Nc)          | $\Delta$ pexE gfp-sidI(Nc)(p), ptrA(p)                | this study                  |
| $\Delta$ pexE/pexF23                | yA1, pabaAI, pyroA4, PexG14, pexE(5) $\Delta$ (ribo+) | Hynes unpublished,          |
| antA15                              | yA1, pabaAI, antA15                                   | (Hynes et al., 2008),       |
| wt sidI-gfp                         | wt, sidI-gfp(Af)(p); phleo(p)                         | this study                  |
| pexG14 sidI-gfp                     | pexG14 sidI-gfp(Af)(p), phleo(p)                      | this study                  |
| <b><i>Neurospora crassa</i></b>     |                                                       |                             |
| 74-OR23-1A(FGSC)                    | wild type (A)                                         | American type culture       |

**Table S5. Plasmids used in this study**

| Name                    | purpose                                                                                    | reference                 |
|-------------------------|--------------------------------------------------------------------------------------------|---------------------------|
| psidD-COS               | cosmid carrying <i>sidD</i> and adjacent <i>sidH</i> and <i>sidF</i>                       | (Schrettl et al., 2007)   |
| pPhleo                  | the phleomycin resistance marker gene <i>ble</i> in bluescript                             | (Punt et al., 1987)       |
| pUCGH                   | carrying EGFP-encoding gene                                                                | (Langfelder et al., 2001) |
| pCAME703-AoHapX-full    | expression vector for N-terminal GFP tagging                                               | (Goda et al., 2005)       |
| pSK275                  | pyrithiamine resistance gene <i>ptrA</i>                                                   | (Kubodera et al., 2000)   |
| pGfp                    | EGFP-encoding gene in pGEM-5zf(+)                                                          | this study                |
| pSidI-Gfp               | C-terminal EGFP tagged <i>A. fumigatus</i> SidI truncation in pGEM-5zf(+)                  | this study                |
| pSPGfp                  | C-terminal EGFP tagged <i>A. fumigatus</i> SidI truncation and resistance gene <i>ptrA</i> | this study                |
| psidH <sup>c</sup>      | functional <i>sidH</i> copy for complementation                                            | this study                |
| pGFP-SidH               | expression plasmid encoding N-terminal GFP-tagged <i>A. fumigatus</i> SidH                 | this study                |
| pGFP-SidH $\Delta$ PTS1 | expression plasmid encoding N-terminal GFP-tagged <i>A. fumigatus</i> SidH lacking PTS1    | this study                |
| pGFP-SidF               | expression plasmid encoding N-terminal GFP-tagged <i>A. fumigatus</i> SidF                 | this study                |
| pGFP-NcSidI             | expression plasmid encoding N-terminal GFP-tagged <i>N. crassa</i> SidI                    | this study                |
| pSidI-Gfp2              | Expression plasmid encoding C-terminal GFP-tagged <i>A. fumigatus</i> SidI (full length)   | this study                |
| pSK379-RFP-PTS1         | Expression plasmid encoding RFP-PTS1                                                       | (Beck & Ebel, 2013)       |

**Table S6. Oligonucleotides used in this study.**

| primer                   | sequence 5' to 3'                                 |
|--------------------------|---------------------------------------------------|
| oAf538RAC1-f             | CAC TGT GGC TTT CGC TTC                           |
| oGFP1                    | GAC CAC ATG AAG CAG CAC                           |
| ogfp4                    | AAC CAC TAC CTG AGC AAC                           |
| osidHgfp1                | ACA <u>AGA TCT</u> TCA ACA GAA GCA CAT CCA AC     |
| osidHgfp2                | CAC <u>GCG GCC GCT</u> CAC CTC CAC TGT GGC TTT CG |
| osidHgfp3                | CTG <u>GCG GCC GCT</u> TCA CAA CTT AGA CGG CC     |
| ogfpsidF2                | ATA <u>GCG GCC GCT</u> TAC AGC TTT GCA TCC CAC    |
| ogfpsidF3                | ATA <u>GGA TCC GCG</u> ACT CAA AGC AGC ACC        |
| oAf <sub>538</sub> AT1-r | AGT TTT GAG CGA GAG GGG                           |
| oAfsidI-1                | CAG <u>TGG ATC CTT</u> TTT CCT TTA TTG CTG CC     |
| oAfsidI-2                | CTA CGG ATG TCT GCA ACC                           |
| oNcSidI-1                | AAT AAT <u>AGA TCT</u> TCA CCG GCG TTG GTA        |
| oNcSidI-2                | TTA <u>GCG GCC GCT</u> CCA TCT TCT TCC CTC AG     |
| oAfsidIgfp1              | ATA <u>GAT ATC</u> AGC CGG ACA AGA AAC AAG        |
| oAfsidIgfp2              | TAT <u>ATC GAT</u> GTT TGT GGT TTC CGT TGG        |

Introduced restriction sites are underlined.

**Table S7. Homologs of *Basidiomycetes* to *A. fumigatus* SidF identified by a BlastP search ([http://www.ncbi.nlm.nih.gov/sutils/genom\\_table.cgi?organism=fungi](http://www.ncbi.nlm.nih.gov/sutils/genom_table.cgi?organism=fungi)).**

| <b>Protein</b> |                                                    | <b>Score<br/>(Bits)</b> | <b>E<br/>Value</b> |
|----------------|----------------------------------------------------|-------------------------|--------------------|
| XP_001731607.1 | [ <i>Malassezia globosa</i> ]                      | 205                     | 3e-59              |
| XP_757579.1    | [ <i>Ustilago maydis</i> ]                         | 182                     | 1e-50              |
| EGO03326.1     | [ <i>Serpula lacrymans</i> var. <i>lacrymans</i> ] | 173                     | 9e-48              |
| XP_003035019.1 | [ <i>Schizophyllum commune</i> ]                   | 171                     | 4e-47              |
| XP_003322498.1 | [ <i>Puccinia graminis</i> f. sp. <i>tritici</i> ] | 163                     | 1e-44              |
| EGG01975.1     | [ <i>Melampsora larici-populina</i> ]              | 158                     | 1e-43              |
| XP_002910369.1 | [ <i>Coprinopsis cinerea</i> okayama]              | 155                     | 1e-40              |
| XP_756191.1    | [ <i>Ustilago maydis</i> ]                         | 147                     | 4e-38              |

**Figure S1. Similarity of *A. fumigatus* SidI with proven and putative Acyl-CoA synthases from *A. nidulans* (Reiser et al., 2010).** FaaB, FatA, FatB, FatC and FatD have been shown to, while PcsA is predicted to, localize to peroxisomes (A) BlastP search results (<http://www.ncbi.nlm.nih.gov/blast/>) using *A. fumigatus* SidI as bait; functionally proven acyl-CoA synthases are in bold; (B) Phylogenetic tree (<http://www.genome.jp/tools-bin/clustalw>); (C) Alignment of *A. fumigatus* SidI and the peroxisomal *A. nidulans* acyl-CoA synthase FatD.

**A**

| Protein                          | Score<br>(Bits) | E-<br>Value  |
|----------------------------------|-----------------|--------------|
| SidI-AN0609 (XP_658213.1)        | 804             | 0.0          |
| FatD-AN4397 (XP_662001.1)        | 164             | 3e-44        |
| FatB-AN5877 (XP_663481.1)        | 97.1            | 2e-21        |
| <b>FacA-AN5626 (XP_663230.1)</b> | <b>86.7</b>     | <b>5e-18</b> |
| FatA-AN5192 (XP_662796.1)        | 87.4            | 3e-18        |
| <b>PcsA-AN5833 (XP_663437.1)</b> | <b>80.9</b>     | <b>3e-16</b> |
| <b>FaaB-AN8280 (XP_681549.1)</b> | <b>57.8</b>     | <b>6e-09</b> |
| FaaA-AN6014 (XP_663618.1)        | 56.6            | 1e-08        |
| FatC-AN6649 (XP_664253.1)        | 50.4            | 9e-07        |

**B**

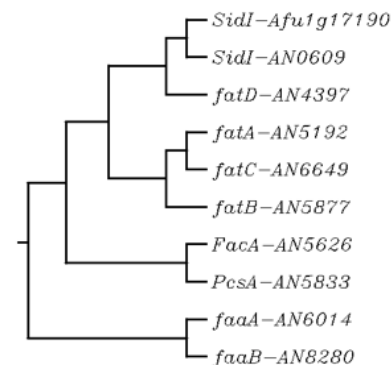

**C**

Identities = 147/523 (28%), Positives = 236/523 (45%), Gaps = 55/523 (11%)

|               |     |                                                               |     |
|---------------|-----|---------------------------------------------------------------|-----|
| <b>AfSidI</b> | 66  | TYTDLKDEADRVARGLLAMGIQKGRIGIMAGNCEQYISVFFAAARVGGAILVVLNNTYTP  | 125 |
|               |     | TY L L +G+ G + + N ++I F AA+ AI LN Y                          |     |
| <b>AnFatD</b> | 28  | TYAQLHSHISAFQEKLAKLGVGHGAAVNLALINSYEFIVGFLLAASWQRAIAAPLNPAYKQ | 87  |
| <b>AfSidI</b> | 126 | SELYYALGHGTDCRLLFLTPRIGRHSLEEVLAQLGPRPKEQGTSSALEEIIILRGQYSGFS | 185 |
|               |     | E + + L+ L PR E A+ GP + + I ++G                               |     |
| <b>AnFatD</b> | 88  | DEFEFYIDDLSSSTLV-LIPR-----ESYAQNGPAV----LAGRKYQAAIAECYWNGTE   | 135 |
| <b>AfSidI</b> | 186 | TYEHVIQRGLPLPSHALQDREAELHSTDVCNLQFTSGSTGNPKAAMLTHHNLVNNRSRFIG | 245 |
|               |     | V + G + + A+ D+ + TSG+TG PKA LTH NL R I                       |     |
| <b>AnFatD</b> | 136 | VVLVDVKELGKLGKGDIGVQTAQ--PDDIALVLHTSGTTGRPKAVPLTHKNLTTTMRNIQ  | 193 |
| <b>AfSidI</b> | 246 | DRMNLTSFDILCCPPPLFHCFLVGLMLAVVTHGSKIIFPSETFDPTAVLHAISDEKCTA   | 305 |
|               |     | LT D PLFH GL+ LA + G +I P++ F + K                             |     |
| <b>AnFatD</b> | 194 | ATYKLTPODRTYLVMLPLFHVHGLLAFLAPLASGGSVIVPTK-FSAHQFWSDFIEYKANW  | 252 |
| <b>AfSidI</b> | 306 | LHGVPMTFEAILSLPKP-PNFDCSNLRTGIIAGAPVPRPLMKRLLLEELNMT--EYTSSY  | 361 |
|               |     | VPT+ + +L P P P +R+ PL + ++L T +Y                             |     |
| <b>AnFatD</b> | 253 | YSAVPTIHQILLKSLPNPIQIRFIRS-----CSSPLSPKTFQDLEKTLNAPVLEAY      | 305 |
| <b>AfSidI</b> | 362 | GLTEASPTCFNALTTDSI---ERRLTVGKVMPHAKAKIIDTQGHIVPIGQRGELCIAGY   | 418 |
|               |     | +TEA+ + +T++ + +R+ +VG + + KI+D G+ VP G E+C+ G                |     |
| <b>AnFatD</b> | 306 | AMTEAA----HQMTSNLPLPAKRQPGSVG-IGQGVEIKILDQSGNEVPQGHEAECVIRGE  | 360 |
| <b>AfSidI</b> | 419 | QLTKGYWNNPEKTAELITDSGVTWLKTGDEAIFDEEGYCSITGRFKDIIIRGENIYP     | 478 |
|               |     | +TKGY NNP + D + +TGD+ D +GY ITGR K++I +GGE I P                |     |
| <b>AnFatD</b> | 361 | NVTKGYLNNPAANKSFTKDG----FFRTGDQGGKDPDGYVITGRIKELINKGGEKISP    | 416 |
| <b>AfSidI</b> | 479 | LEIEERLAAHPAIEVASVIGIPDQ-KYGEVVGAFLLAADVARSDEELRAWTRETTLGR    | 537 |
|               |     | +E++ L +P + A IPD YGE +GA + L + +A +++EL++W +E L +            |     |
| <b>AnFatD</b> | 417 | IELDNTLLQNPVGEAVCFaipDPGHYGEDIGAAVVLKSGQNA--TEDELKSWVQEKLAK   | 474 |
| <b>AfSidI</b> | 538 | HKAPQYFFVFGEEGVDRITIPVTGSGKVRKVDLRKIAASVLERR                  | 580 |
|               |     | K P+ + IP T +GK+++ RK+A ++L+ +                                |     |
| <b>AnFatD</b> | 475 | FKTPK-----QQIPKTATGKIQR---RKVAEAMLPKPK                        | 503 |

**Figure S2. Alignment of *A. fumigatus* SidH and the mitochondrial localized enoyl-CoA hydratase EchA from *A. nidulans* that is involved in  $\beta$ -oxidation (Maggio-Hall & Keller, 2004). Homologs with PTS1 motifs have been postulated to be involved in peroxisomal  $\beta$ -oxidation (Maggio-Hall & Keller, 2004).**

BlastP: Score = 228, E-value = 2e-73

Identities = 123/279(44%), Positives = 167/279(59%), Gaps = 15/279(5%)

```

Af SidH 1    MSTEAHPTVQGCLVSFPTPHI-----LLLTLNRPEKRNCSLATS AEIQRLWTFD TQ 53
          + + A P+ + L S P P +      +++TLNRP+ N +S      E+      + +D
An EchA 23   LYSSAAPS YEHI LTSTPKPGVGLNTDFTVIVTLNRPKALNALSSPLFKEVNDALSKYDES 82

Af SidH 54   PALYVAIIITGTGESFCAGADLKEWNDLN-ARGITNEMTAP--GLAGLPRRRGSKPIIAAV 110
          + IITG+ ++F AGAD+KE L A +N AP LA R      KP+IAAV
An EchA 83   KDIGAI IITGSEKAF AAGADIKEMAPLTFASAYSNNFIAPWSHLANSIR----KPVIAAV 138

Af SidH 111  NGYCLGGGFEMVANCDIVVASENATFGLPEVQRGIAAVAGSLPRLVRLV LGQRAAEIALS 170
          +G+ LGGG E+   CDI+ + +ATFG PE++ G+   AG   RL   +GK +A E+ L+
An EchA 139  SGFALGGGCE LALMCDIIYCTASATFGQPEIKLGVIPGAGGSQRLTAAV GSKAMELILT 198

Af SidH 171  GLSF S ASQLERWGLVNRVVE--HDQLLATAVEIATAISRNSPDSVRVTMEGLHYGWEMAS 228
          G +FS +   WG+ +VV+ ++LL AV+ A I+ S +   E ++ ++
An EchA 199  GKNFSGKEAGEWGVAAKVVDGGKEELLEAVKTAETIAGYSRVATVAAKEVVNKSQDLGV 258

Af SidH 229  VE--EASSALV-----DQWYAKLMA-----GENFHEGVRAFVEKRKPQW 265
          E E   L       DQ   + ++       G + +G+ AF EK+KPQW
An EchA 259  REGVEYERRLFHGLFGSQDQKIGRFLSLYHYSKNGTDGEKGMTAF AEKKKPQW 311

```
